# Supplementary material for: Effect of overexpression of endogenous and exogenous Streptomyces antibiotic regulatory proteins on tacrolimus (FK506) production in Streptomyces sp. KCCM11116P
Source: Royal Society of Chemistry journal article supplement (doi:10.1039/c4ra15038d), 2015-01-01
Supplement: c4ra15038d1.pdf [file c4ra15038d1.pdf]

Supplementary materials to RSC Advances

**Effect of overexpression of endogenous and exogenous *Streptomyces* antibiotic regulatory proteins on tacrolimus (FK506) production in *Streptomyces* sp. KCCM 11116P**

Chao Chen<sup>1</sup>, Xinqing Zhao<sup>1, 2\*</sup>, Liangyu Chen<sup>1</sup>, Yingyu Jin<sup>3</sup>, Zongbao K. Zhao<sup>4</sup>, Joo-Won Suh<sup>3</sup>

<sup>1</sup>*School of Life Science and Biotechnology, Dalian University of Technology, Dalian 116024, China*

<sup>2</sup>*School of Life Science and Biotechnology, Shanghai Jiaotong University, Shanghai 200240, China*

<sup>3</sup>*Division of Bioscience and Bioinformatics, Myongji University, Yongin 449-728, South Korea*

<sup>4</sup>*Department of Biotechnology, Dalian Institute of Chemical Physics, Chinese Academy of Sciences, Dalian 116023, China*

\*Corresponding author

Tel: +86-411-84706319, Fax: +86-411-84706329 (XQ Zhao)

E-mails: [xqzhao@dlut.edu.cn](mailto:xqzhao@dlut.edu.cn) (XQ Zhao).

## Supplementary tables

**Table S1** Strains and plasmids used in this study.

|                                              | Description                                                                                                                     | Source and references |
|----------------------------------------------|---------------------------------------------------------------------------------------------------------------------------------|-----------------------|
| <b>Strains</b>                               |                                                                                                                                 |                       |
| <i>E. coli</i> DH5 $\alpha$                  | Cloning host                                                                                                                    | Laboratory stock      |
| <i>E. coli</i> ET12567                       | <i>dam dcm hsdS cat tet</i>                                                                                                     | [1]                   |
| <i>E. coli</i> ET12567/ pWHM3                | Strain to obtain non-methylated pWHM3                                                                                           | This study            |
| <i>E. coli</i> ET12567/ pWHM3- <i>Sx5140</i> | Strain to obtain non-methylated pWHM3- <i>Sx5140</i>                                                                            | This study            |
| <i>E. coli</i> ET12567/ pWHM3- <i>bulZ</i>   | Strain to obtain non-methylated pWHM3- <i>bulZ</i>                                                                              | This study            |
| <i>E. coli</i> ET12567/ pWHM3- <i>bulY</i>   | Strain to obtain non-methylated pWHM3- <i>bulY</i>                                                                              | This study            |
| <i>Streptomyces</i> sp. KCCM 11116P          | Wild-type FK506 producer                                                                                                        | Laboratory stock      |
| <i>S. xinghaiensis</i> S187 <sup>T</sup>     | Source to obtain <i>Sx5140</i>                                                                                                  | [2]                   |
| <i>Streptomyces</i> sp. CC01                 | <i>Streptomyces</i> sp. KCCM 11116P transformed with the empty plasmid pWHM3 which was used as control strain, Tsr <sup>r</sup> | This study            |

**Table S1 Cont.**

|                               | <b>Description</b>                                                                                   | <b>Source</b> |
|-------------------------------|------------------------------------------------------------------------------------------------------|---------------|
| <i>Streptomyces</i> sp. CC02  | <i>Streptomyces</i> sp. KCCM 11116P transformed with plasmid pWHM3- <i>bulZ</i> , Tsr <sup>r</sup>   | This study    |
| <i>Streptomyces</i> sp. CC03  | <i>Streptomyces</i> sp. KCCM 11116P transformed with plasmid pWHM3- <i>bulY</i> , Tsr <sup>r</sup>   | This study    |
| <i>Streptomyces</i> sp. C5140 | <i>Streptomyces</i> sp. KCCM 11116P transformed with plasmid pWHM3- <i>Sx5140</i> , Tsr <sup>r</sup> | This study    |
| <b>Plasmids</b>               |                                                                                                      |               |
| pMD-19T                       | Cloning vector, Amp <sup>r</sup>                                                                     | Takara        |
| pMD-19T- <i>bulZ</i>          | pMD-19T carrying <i>bulZ</i> , Amp <sup>r</sup>                                                      | This study    |
| pMD-19T- <i>bulY</i>          | pMD-19T carrying <i>bulY</i> , Amp <sup>r</sup>                                                      | This study    |
| pMD-19T- <i>Sx5140</i>        | pMD-19T carrying <i>Sx5140</i> , Amp <sup>r</sup>                                                    | This study    |

**Table S1 Cont.**

|                      | <b>Description</b>                                                                                           | <b>Source</b> |
|----------------------|--------------------------------------------------------------------------------------------------------------|---------------|
| pWHM3                | Cloning vector, colE1 replicon, pSG5 replicon, Tsr <sup>r</sup> , Amp <sup>r</sup>                           | [3]           |
| pWHM3- <i>bulZ</i>   | pWHM3 carrying <i>bulZ</i> in <i>Bam</i> HI- <i>Hind</i> III sites, Amp <sup>r</sup> , Tsr <sup>r</sup>      | This study    |
| pWHM3- <i>bulY</i>   | pWHM3 carrying <i>bulY</i> in <i>Bam</i> HI- <i>Hind</i> III sites, Amp <sup>r</sup> , Tsr <sup>r</sup>      | This study    |
| pWHM3- <i>Sx5140</i> | pWHM3 carrying <i>Sx5140</i> in <i>Bam</i> HI- <i>Hind</i> III sites, Amp <sup>r</sup> ,<br>Tsr <sup>r</sup> | This study    |

**Table S2** Primers used in this study\*.

| Primers                        | 5' to 3' primer sequences             | Product size | Purpose                     |
|--------------------------------|---------------------------------------|--------------|-----------------------------|
| <i>bulZ</i> -FP <sup>a</sup>   | GCTCTAGAATGAGAATTCAGGTTCTGGG          | 822 bp       | To amplify                  |
| <i>bulZ</i> -RP <sup>b</sup>   | AAAAAGCTTTCAGGCGGCGAAGAGGTC<br>GA     |              | <i>bulZ</i>                 |
| <i>bulY</i> -FP <sup>a</sup>   | GCTCTAGAATGGATATTGATGTGCTGGG          | 867 bp       | To amplify                  |
| <i>bulY</i> -RP <sup>b</sup>   | AAAAAGCTTTCACACCTGCGCCATGCGG<br>C     |              | <i>bulY</i>                 |
| <i>Sx5140</i> -FP <sup>c</sup> | AAAGGATCCATGGACATCAAGGTATTG<br>GGCCCG | 795 bp       | To amplify<br><i>Sx5140</i> |
| <i>Sx5140</i> -RP <sup>b</sup> | AAAAAGCTTTCAGCCCGCGGCGGGCAC           |              |                             |
| <i>hrdB</i> -FP                | AGCCGTTTCCATCGTTCC                    | 126 bp       | Control for                 |
| <i>hrdB</i> -RP                | GATCTGCCCATCAGCCTTTC                  |              | qRT-PCR                     |
| <i>tsuR1</i> -FP               | TGCTTCTGTGTTTCGACGAGTG                | 105 bp       | qRT-PCR                     |
| <i>tsuR1</i> -RP               | TTGGACGGGAAGTGAAAGTAGAG               |              | of <i>tsuR</i>              |
| <i>tsuS1</i> -FP               | ATGTCGTCCTCGCCGAAA                    | 95 bp        | qRT-PCR                     |
| <i>tsuS1</i> -RP               | GTAGTGGTCGCTGGTGTGCT                  |              | of <i>tsuS1</i>             |
| <i>tsuS2</i> -FP               | TGGAAGGCGACCACTTCA                    | 98 bp        | qRT-PCR                     |
| <i>tsuS2</i> -RP               | CGTTTCTGCGGCAATCAG                    |              | of <i>tsuS2</i>             |
| <i>fkbN</i> -FP                | ATCACCTCACTGACGGAGTCG                 | 80 bp        | qRT-PCR                     |
| <i>fkbN</i> -RP                | TGGTCGGCTATCTCCCTGTT                  |              | of <i>fkbN</i>              |
| <i>fkbG</i> -FP                | GGGTCGTTTCGATGTCGTGT                  |              |                             |

**Table S2 Cont.**

| Primers         | 5' to 3' primer sequences | Product size | Purpose                   |
|-----------------|---------------------------|--------------|---------------------------|
| <i>fkbG</i> -RP | GCTTCCGCAACAAGGTGA        | 256 bp       | qRT-PCR<br>of <i>fkbG</i> |
| <i>fkbH</i> -FP | CTGGGATCTGGACAACACCTT     | 143 bp       | qRT-PCR                   |
| <i>fkbH</i> -RP | GGTCGTGGTCGTTCTTGCT       |              | of <i>fkbH</i>            |
| <i>fkbI</i> -FP | ATGACATCGCAGGGAATGG       | 85 bp        | qRT-PCR                   |
| <i>fkbI</i> -RP | TGGTCAGCTCCTTCAGATAGGTC   |              | of <i>fkbI</i>            |
| <i>fkbQ</i> -FP | CACGCCGATCACCGTATGTA      | 121 bp       | qRT-PCR                   |
| <i>fkbQ</i> -RP | GAAATGCCACCCGAGAA         |              | of <i>fkbQ</i>            |
| <i>tcsA</i> -FP | GCTTCTTCTACTCCCACGGTCT    | 81 bp        | qRT-PCR                   |
| <i>tcsA</i> -RP | GGGTCATGTCGTTACCATC       |              | of <i>tcsA</i>            |
| <i>tcsB</i> -FP | CGGACTGTTACCCGACGACT      | 178 bp       | qRT-PCR                   |
| <i>tcsB</i> -RP | CCCGTGCAGTTTGGAGAA        |              | of <i>tcsB</i>            |
| <i>tcsD</i> -FP | CAGGTGTCGTTCTCCGACTG      | 96 bp        | qRT-PCR                   |
| <i>tcsD</i> -RP | GATTCTGCTGGCGTTGAGG       |              | of <i>tcsD</i>            |

\*FP and RP stand for forward primer and reverse primer in each primer pairs, respectively, the purpose of PCR using these primers was indicated in the table.

Underlined: a. *Xba*I site TCTAGA; b. *Hind*III site AAGCTT; c. *Bam*HI site GGATCC.

## Supplementary figures

**Figure S1.** Effect of precursor addition on FK506 production in the transformants. Disodium malonate<sup>4</sup> was selected as a precursor and was added at 4<sup>th</sup> day during fermentation of *Streptomyces* sp. CC01 and *Streptomyces* sp. C5140 at a final concentration of 5 mM. Samples were collected from the 5<sup>th</sup> day of fermentation, and the fermentation and detection procedures were described in Materials and methods in section 2.5 and 2.6.

**Figure S2.** Quantitative real-time RT-PCR analysis of *tsuS2* in *Streptomyces* sp. CC01, *Streptomyces* sp. CC02, *Streptomyces* sp. CC03 and *Streptomyces* sp. C5140. *tsuS2* expression levels at 24 h and 48 h were compared with that of the control strain *Streptomyces* sp. CC01, and was quantified by the fold change. The expression level of *tsuS2* at 72 h was undetectable and thus the result was not included in this manuscript.

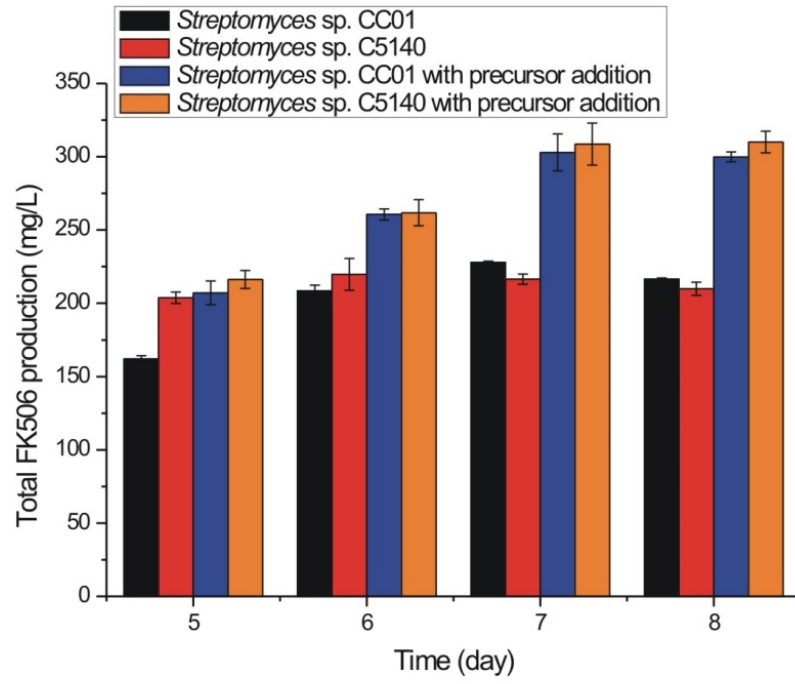

Figure S1



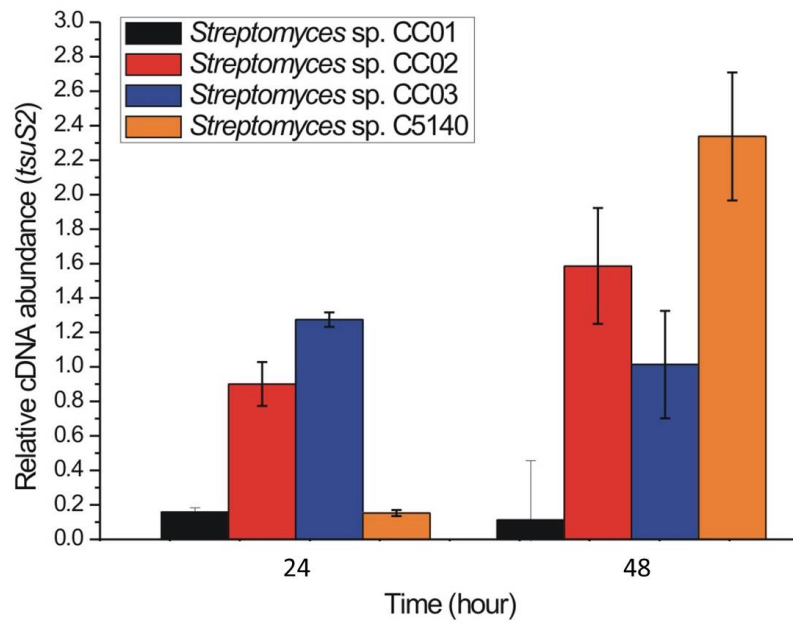

Figure S2

## References

- [1] D. J. MacNeil, K. M. Gewain, C. L. Ruby, G. Dezeny, P. H. Gibbons and T. MacNeil, *Gene*, 1992, **111**, 61-68.
- [2] X. Q. Zhao, W. J. Li, W. C. Jiao, Y. Li, W. J. Yuan, Y. Q. Zhang, H. P. Klenk, J. W. Suh and F. W. Bai, *Int. J. Syst. Evol. Microbiol.*, 2009, **59**, 2870-2874.
- [3] J. Vara, M. Lewandowska-Skarbek, Y. G. Wang, S. Donadio and C. Hutchinson, *J. Bacteriol.*, 1989, **171**, 5872-5881.
- [4] W. J. Du, D. Huang, M. L. Xia, J. P. Wen and M. Huang, *J. Ind. Microbiol. Biotechnol.*, 2014, **41**, 1131-1143.
